# Supplementary material for: Enhanced NH3 Sensing Performance of Mo Cluster-MoS2 Nanocomposite Thin Films via the Sulfurization of Mo6 Cluster Iodides Precursor
Source: MDPI journal article supplement (doi:10.3390/nano13030478), 2023-01-24
Supplement: s1 [file s1]

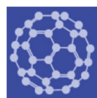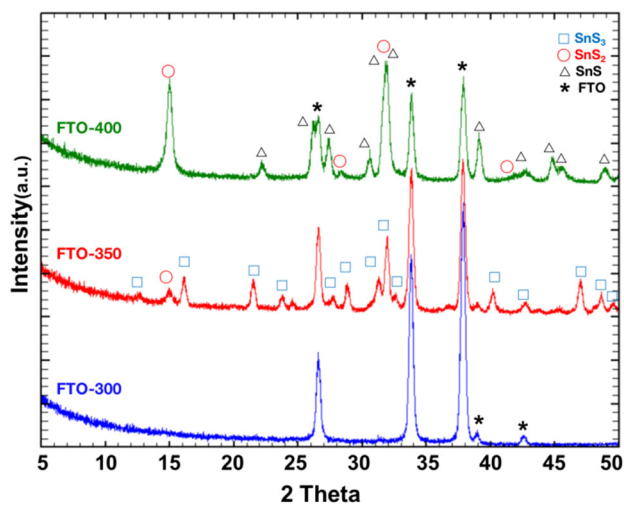

(a)

**Figure S1.** GIXRD pattern of FTO substrate sulfurized at different temperatures,  $w = 0.8$ .

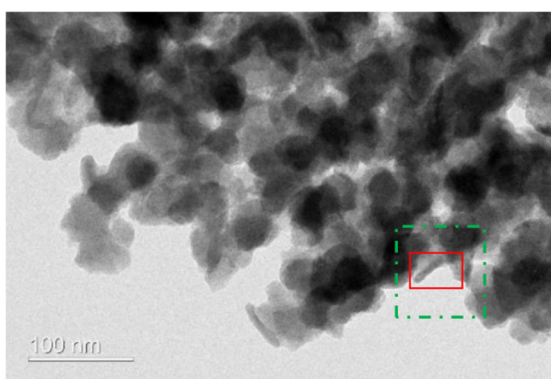

(a)

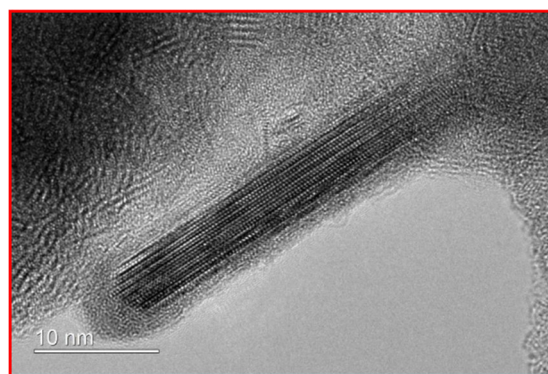

(b)

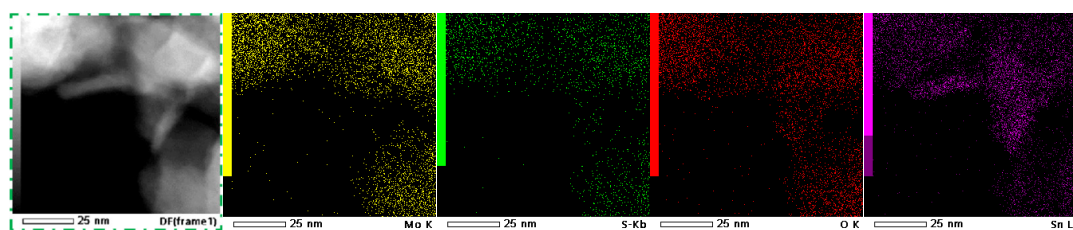

(c)

**Figure S2.** HRTEM observation of MI-400 powder scratched from thin film; the same observation area is marked in the figure (a) HRTEM image of MI-400 with the scale bar at 100 nm; (b) scale bar at 10 nm; (c) Element mapping from HRTEM equipped with EDX device with the scale bar at 25 nm.

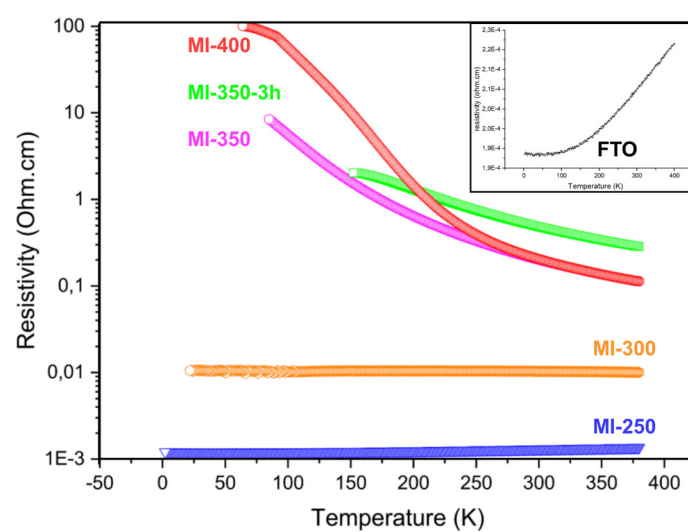

**Figure S3.** Electrical measurements of the sulfurized samples at different temperatures, with a blank FTO substrate inserted at the top right as a reference.
